# Supplementary material for: Chitinase-3 like-protein-1 promotes glioma progression via the NF-κB signaling pathway and tumor microenvironment reprogramming
Source: PubMed Central journal article supplement (PMC9576612; doi:10.7150/thno.75069), 2022-10-03
Supplement: thnov12p6989s1.pdf [file thnov12p6989s1.pdf]

## **Supplementary Figure legends**

**Supplementary Figure 1.** Magnetic resonance imaging (MRI) and 3D model reconstruction-guided tumor localization and surgical sampling.

### **Supplementary Figure 2. Knockdown of CHI3L1 in U87MG and A172 cell lines.**

Transfection and knockdown efficiencies were validated by fluorescence microscopy (A) and western blot (B), respectively; Scale bars represent 100  $\mu\text{m}$ .

### **Supplementary Figure 3. Myeloid landscape delineation in human glioma. (A)**

UMAP plot of monocyte, microglia and macrophage populations, with each cell color coded for cell type. **(B-C)** The distribution of enrichment score of EMT **(B)** and angiogenesis **(C)** pathway in UMAP plot. **(D)** Pseudotime trajectory of monocyte, microglia, and macrophage state transition inferred by Monocle 2 and characterized by cell type. **(E)** UMAP dot plot of neutrophil from 13 patients, with each cell color coded for cell type. **(F-G)** UMAP plot showed the evolutionary trajectory of neutrophils by cluster **(F)** and pseudotime **(G)**.

### **Supplementary Figure 4. Overexpression of CHI3L1 or ACTN4 promotes glioma cells**

proliferation and migration. A, Proliferation of U251 cells evaluated by CCK-8 assay. B. Migration of U251 and U118 cells evaluated by wound healing assay; Student's t test, \* $p < 0.05$ , compared with the control group; # $p < 0.05$ , compared with the CHI3L1 group; & $p < 0.05$ , compared with the ACTN4 group.

GBM IV  
Male 55y

Intratumor

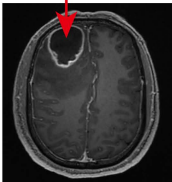

Axial

Peritumor

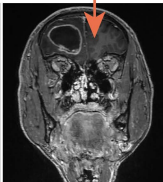

Coronal

Tumor border

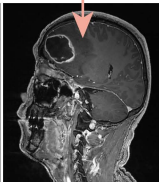

Sagittal

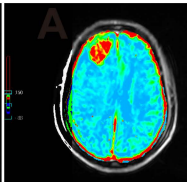

fMRI

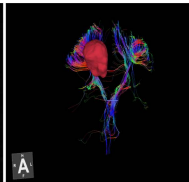

3D model  
reconstruction

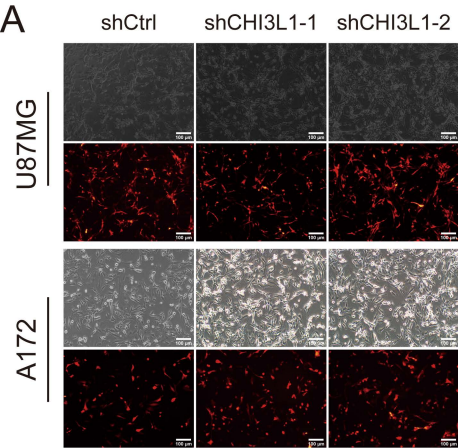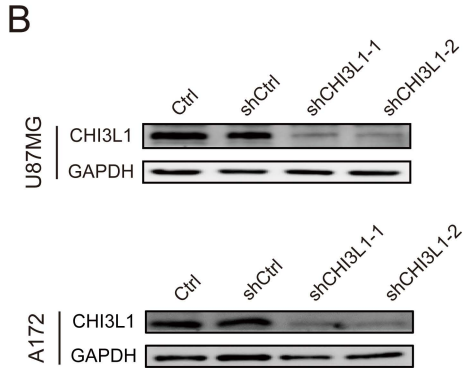

**A**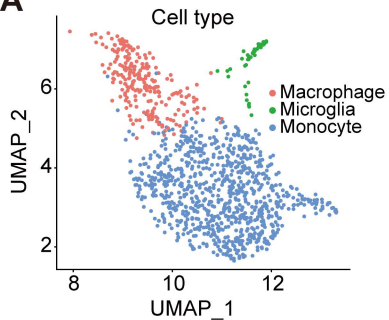**B**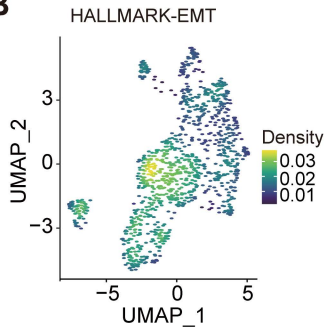**C**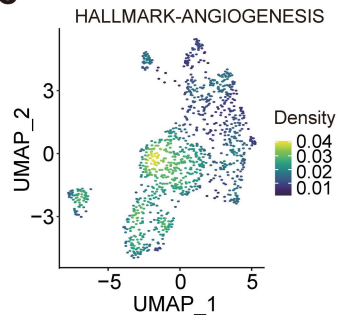**D**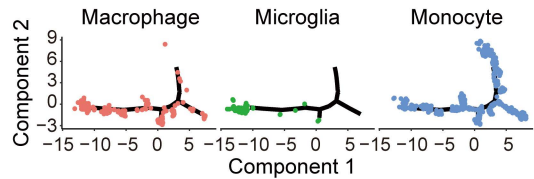**E**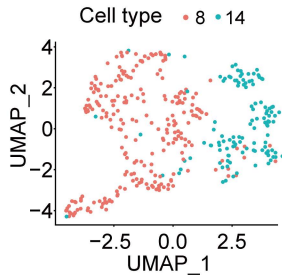**F**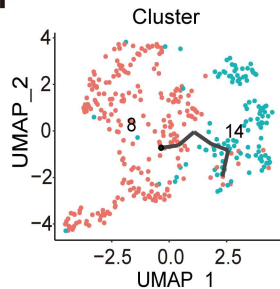**G**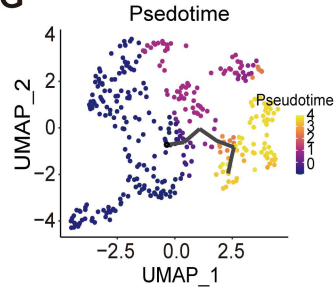

**A**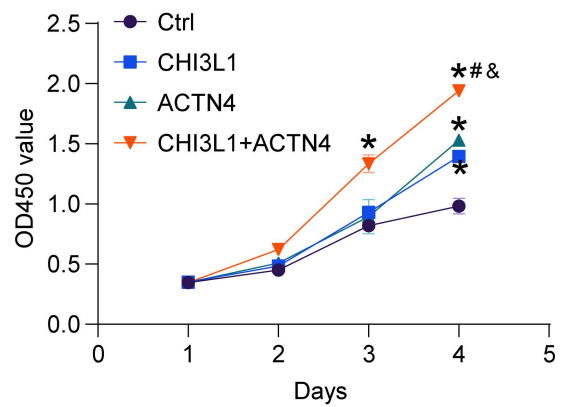**B**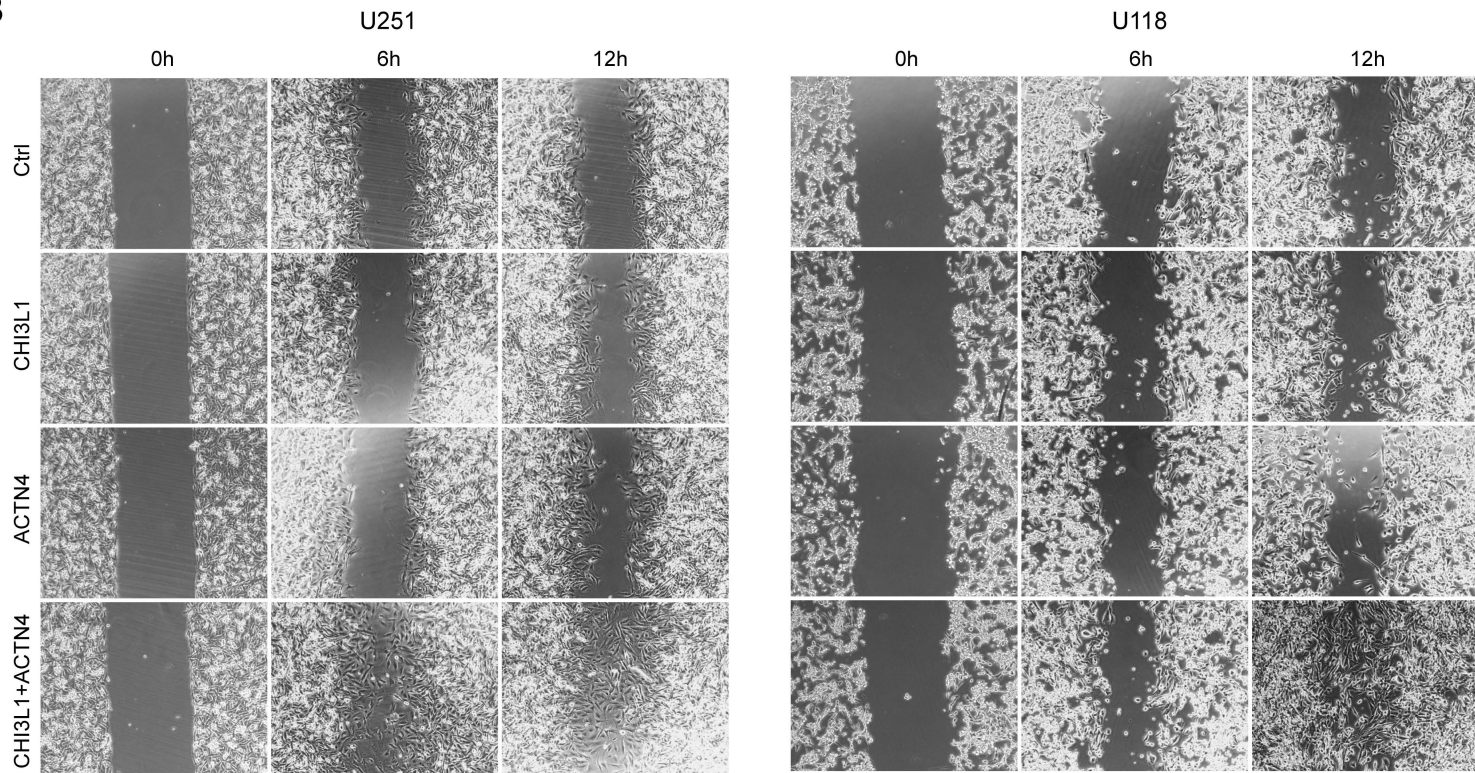

Supplementary table 1: Summary of antibodies applied in western blot, related to section “Western Blot”.

| Name                             | Manufacturer              | Cat.              | Dilution rate |
|----------------------------------|---------------------------|-------------------|---------------|
| GAPDH                            | CST, USA                  | 5174S             | 1:1000        |
| CHI3L1                           | Abcam, USA                | ab77528           | 1:1000        |
| Phospho-NF-κB p65                | CST, USA                  | 3033S             | 1:1000        |
| NF-κB p65                        | CST, USA                  | 6956S             | 1:1000        |
| <b>NFKB1</b>                     | <b>Proteintech, China</b> | <b>66992-1-Ig</b> | <b>1:1000</b> |
| Phospho-SAPK/JNK                 | CST, USA                  | 9251S             | 1:1000        |
| JNK2                             | CST, USA                  | 9258S             | 1:1000        |
| Phospho-p44/42 MAPK (Erk1/2)     | CST, USA                  | 4370S             | 1:1000        |
| ERK1 + ERK2                      | Abcam, USA                | ab184699          | 1:1000        |
| Phospho-Akt (Ser473)             | CST, USA                  | 4060S             | 1:1000        |
| Akt                              | CST, USA                  | 4691S             | 1:1000        |
| Phospho-p38 MAPK (Thr180/Tyr182) | CST, USA                  | 4511S             | 1:1000        |
| p38α MAPK                        | CST, USA                  | 9218S             | 1:1000        |
| PCNA                             | CST, USA                  | 2586S             | 1:1000        |
| α-actinin-4                      | Santa Cruz, USA           | sc-393495         | 1:100         |

Supplementary table 2: Summary of primer sequence, related to section “Quantitative real-time PCR (qRT-PCR)”.

| Gene name         |                | Sequence                |
|-------------------|----------------|-------------------------|
| Homo-GAPDH        | Forward Primer | GTCTCCTCTGACTTCAACAGCG  |
|                   | Reverse Primer | ACCACCCTGTTGCTGTAGCCAA  |
| Homo-CD163        | Forward Primer | CCAGAAGGAACTTGTAGCCACAG |
|                   | Reverse Primer | CAGGCACCAAGCGTTTTGAGCT  |
| Homo-IL-10        | Forward Primer | TCTCCGAGATGCCTTCAGCAGA  |
|                   | Reverse Primer | TCAGACAAGGCTTGGCAACCCA  |
| Homo-CD68         | Forward Primer | CGAGCATCATTCTTTCACCAGCT |
|                   | Reverse Primer | ATGAGAGGCAGCAAGATGGACC  |
| Homo-Arg1         | Forward Primer | TCATCTGGGTGGATGCTCACAC  |
|                   | Reverse Primer | GAGAATCCTGGCACATCGGGAA  |
| Homo-RETNLB       | Forward Primer | GCAAGAAGCTCTCGTGTGCTAG  |
|                   | Reverse Primer | AACATCCCACGAACCACAGCCA  |
| Homo-IL-1 $\beta$ | Forward Primer | CCACAGACCTTCCAGGAGAATG  |
|                   | Reverse Primer | GTGCAGTTCAGTGATCGTACAGG |
| Homo-CD197        | Forward Primer | CAACATCACCAGTAGCACCTGTG |
|                   | Reverse Primer | TGCGGAACTTGACGCCGATGAA  |
| Homo-HLA-DR       | Forward Primer | AGCTGTGGACAAAGCCAACCTG  |
|                   | Reverse Primer | CTCTCAGTTCCACAGGGCTGTT  |
| Homo-IL-6         | Forward Primer | AGACAGCCACTCACCTCTTCAG  |
|                   | Reverse Primer | TTCTGCCAGTGCCTCTTTGCTG  |
| Homo-MCP-1        | Forward Primer | AGAATCACCAGCAGCAAGTGTCC |
|                   | Reverse Primer | TCCTGAACCCACTTCTGCTTGG  |
| Homo-iNOS         | Forward Primer | GCTCTACACCTCCAATGTGACC  |
|                   | Reverse Primer | CTGCCGAGATTTGAGCCTCATG  |
| Homo-eNOS         | Forward Primer | GAAGGCGACAATCCTGTATGGC  |
|                   | Reverse Primer | TGTTGAGGGACACCACGTCAT   |

|             |                |                         |
|-------------|----------------|-------------------------|
| Homo-CXCL12 | Forward Primer | CTCAACACTCCAAACTGTGCCC  |
|             | Reverse Primer | CTCCAGGTA CTCTGAATCCAC  |
| Homo-CXCR4  | Forward Primer | CTCCTCTTTGTCATCACGCTTCC |
|             | Reverse Primer | GGATGAGGACACTGCTGTAGAG  |
| Homo-VEGF   | Forward Primer | TTGCCTTGCTGCTCTACCTCCA  |
|             | Reverse Primer | GATGGCAGTAGCTGCGCTGATA  |
| Mus-CD206   | Forward Primer | GTTACCTGGAGTGATGGTTCTC  |
|             | Reverse Primer | AGGACATGCCAGGGTCACCTTT  |
| Mus-CD163   | Forward Primer | GGCTAGACGAAGTCATCTGCAC  |
|             | Reverse Primer | CTTCGTTGGTCAGCCTCAGAGA  |
| Mus-CD68    | Forward Primer | GGCGGTGGAATACAATGTGTCC  |
|             | Reverse Primer | AGCAGGTCAAGGTGAACAGCTG  |
| Mus-RETNLB  | Forward Primer | GAACGCGCAATGCTCCTTTGAG  |
|             | Reverse Primer | AGCCACAAGCACATCCAGTGAC  |
| Mus-CD197   | Forward Primer | AGAGGCTCAAGACCATGACGGA  |
|             | Reverse Primer | TCCAGGACTTGGCTTCGCTGTA  |
| Mus-CD80    | Forward Primer | CCTCAAGTTTCCATGTCCAAGGC |
|             | Reverse Primer | GAGGAGAGTTGTAACGGCAAGG  |
| Mus-Ym1     | Forward Primer | TACTCACTTCCACAGGAGCAGG  |
|             | Reverse Primer | CTCCAGTGTAGCCATCCTTAGG  |

---



Supplementary table 3. Correlation between mRNA expression of CHI3L1 and clinical characteristics in patients with glioma in TCGA and CCGA (mRNA-array\_301) dataset. R/S: Recurrent/Secondary

| Characteristics  | Total<br>(N) | CGGA_mRNA-array_301    |                       |                   | Total<br>(N) | TCGA                   |                       |                   |
|------------------|--------------|------------------------|-----------------------|-------------------|--------------|------------------------|-----------------------|-------------------|
|                  |              | CHI3L1 <sup>high</sup> | CHI3L1 <sup>low</sup> | p value           |              | CHI3L1 <sup>high</sup> | CHI3L1 <sup>low</sup> | p value           |
| PRS_type         |              |                        |                       | 0.0684            |              |                        |                       | 0.1774            |
| Primary          | 264 (88.6%)  | 127 (42.6%)            | 137(46.0%)            |                   | 160 (97.0%)  | 79 (47.9%)             | 81 (49.1%)            |                   |
| R/S              | 34 (11.4%)   | 22 (7.4%)              | 12 (4.0%)             |                   | 5 (3.0%)     | 4 (2.4%)               | 1 (0.6%)              |                   |
| Age              |              |                        |                       | <b>0.0002</b>     |              |                        |                       | 0.1616            |
| <=60             | 276 (92.3%)  | 130 (38.1%)            | 146 (54.2%)           |                   | 78 (47.5%)   | 35 (21.3%)             | 43 (26.2%)            |                   |
| >60              | 23 (7.7%)    | 20 (5.7%)              | 3 (2.0%)              |                   | 86 (52.5%)   | 48 (29.3%)             | 38 (23.2%)            |                   |
| Gender           |              |                        |                       | 0.8691            |              |                        |                       | 0.0677            |
| Male             | 180 (59.8%)  | 91 (30.2%)             | 89 (29.6%)            |                   | 104 (63.4%)  | 47 (30.5%)             | 57 (32.9%)            |                   |
| Female           | 121 (40.2%)  | 60 (19.9%)             | 61 (20.3%)            |                   | 60 (36.6%)   | 36 (22.6%)             | 24 (14.0%)            |                   |
| Grade            |              |                        |                       | <b>&lt;0.0001</b> |              |                        |                       | /                 |
| II               | 117 (39.3%)  | 17 (5.7%)              | 100 (33.6%)           |                   | /            | /                      | /                     |                   |
| III              | 57 (19.1%)   | 30 (10.1%)             | 27 (9.0%)             |                   | /            | /                      | /                     |                   |
| IV               | 124 (41.6%)  | 102 (34.2%)            | 22 (7.4%)             |                   | /            | /                      | /                     |                   |
| TCGA subtype     |              |                        |                       | <b>&lt;0.0001</b> |              |                        |                       | <b>&lt;0.0001</b> |
| MES              | 111 (36.9%)  | 99 (32.9%)             | 12 (4.0%)             |                   | 56 (34.0%)   | 43 (26.1%)             | 13 (7.9%)             |                   |
| CL               | 23 (7.6%)    | 16 (5.3%)              | 7 (2.3%)              |                   | 42 (25.4%)   | 19 (11.5%)             | 23 (13.9%)            |                   |
| NL               | 81 (26.9%)   | 18 (6.0%)              | 63 (20.9%)            |                   | 28 (17.0%)   | 16 (9.7%)              | 12 (7.3%)             |                   |
| PL               | 86 (28.6%)   | 18 (6.0%)              | 68 (22.6%)            |                   | 31 (18.8%)   | 5 (3.0%)               | 26 (15.8%)            |                   |
| G-CIMP           | /            | /                      | /                     |                   | 8 (4.8%)     | 0 (0.0%)               | 8 (4.8%)              |                   |
| Radio status     |              |                        |                       | 0.6446            |              |                        |                       | 0.4141            |
| untreated        | 46 (16.3%)   | 21 (7.5%)              | 25 (8.8%)             |                   | 6 (3.6%)     | 4 (2.4%)               | 2 (1.2%)              |                   |
| treated          | 237 (83.7%)  | 117 (41.3%)            | 120 (42.4%)           |                   | 159 (96.4%)  | 79 (50.3%)             | 80 (46.1%)            |                   |
| TMZ status       |              |                        |                       | <b>0.0014</b>     |              |                        |                       | 0.2709            |
| untreated        | 144 (52.0%)  | 60 (21.7%)             | 84 (30.3%)            |                   | 55 (33.3%)   | 31 (18.8%)             | 24 (14.5%)            |                   |
| treated          | 133 (48.0%)  | 81 (29.2%)             | 52 (18.8%)            |                   | 110 (66.7%)  | 52 (31.5%)             | 58 (35.2%)            |                   |
| IDH status       |              |                        |                       | <b>&lt;0.0001</b> |              |                        |                       | <b>0.0015</b>     |
| WT               | 165 (55.2%)  | 123 (41.1%)            | 42 (14.1%)            |                   | 151 (94.4%)  | 82 (51.3%)             | 69 (43.1%)            |                   |
| Mut              | 134 (44.8%)  | 28 (9.4%)              | 106 (35.4%)           |                   | 9 (5.6%)     | 0 (0.0%)               | 9 (5.6%)              |                   |
| 1p19q codeletion |              |                        |                       | <b>&lt;0.0001</b> |              |                        |                       |                   |
| non-codel        | 76 (82.6%)   | 45 (48.9%)             | 31 (33.7%)            |                   | /            | /                      | /                     |                   |
| codel            | 16 (17.4%)   | 0 (0.0%)               | 16 (17.4%)            |                   | /            | /                      | /                     |                   |

| Characteristics    | Total<br>(N) | CGGA_mRNA-array_301    |                       |                   | Total<br>(N) | TCGA                   |                       |               |
|--------------------|--------------|------------------------|-----------------------|-------------------|--------------|------------------------|-----------------------|---------------|
|                    |              | CHI3L1 <sup>high</sup> | CHI3L1 <sup>low</sup> | p value           |              | CHI3L1 <sup>high</sup> | CHI3L1 <sup>low</sup> | p value       |
| MGMTp methylation  |              |                        |                       | 0.3438            |              |                        |                       | <b>0.0274</b> |
| unmethylated       | 187 (65.4%)  | 91 (31.8%)             | 96 (33.6%)            |                   | 68 (54.0%)   | 38 (30.2%)             | 30 (23.8%)            |               |
| methylated         | 99 (34.6%)   | 54 (18.9%)             | 45 (15.7%)            |                   | 58 (46.0%)   | 21(16.6%)              | 37 (29.4%)            |               |
| G-CIMP methylation |              |                        |                       | /                 |              |                        |                       | <b>0.0018</b> |
| unmethylated       | /            | /                      | /                     |                   | 155 (94.5%)  | 83 (50.6%)             | 72 (43.9%)            |               |
| methylated         | /            | /                      | /                     |                   | 9 (5.5%)     | 0 (0.0%)               | 9 (5.5%)              |               |
| Censor             |              |                        |                       | <b>&lt;0.0001</b> |              |                        |                       | 0.1441        |
| Living             | 100 (34.8%)  | 25 (8.7%)              | 75 (26.1%)            |                   | 50 (30.5%)   | 21 (12.8%)             | 29 (17.7%)            |               |
| Deceased           | 187 (65.2%)  | 123 (42.9%)            | 64 (22.3%)            |                   | 114 (69.5%)  | 62 (37.8%)             | 52 (31.7%)            |               |

Supplementary table 4. Univariate Cox regression analysis of clinical characteristics associated with overall survival in CCGA mRNA-array\_301 and CCGA mRNAseq\_693 dataset.

| Characteristics     | Total<br>(N) | CGGA_mRNA-array_301   |                   | Total<br>(N) | CGGA_mRNAseq_693     |                   |
|---------------------|--------------|-----------------------|-------------------|--------------|----------------------|-------------------|
|                     |              | Hazard ratio (95%CI)  | p value           |              | Hazard ratio (95%CI) | p value           |
| CHI3L1              | 301          |                       |                   | 693          |                      |                   |
| Low                 |              | Reference             |                   |              | Reference            |                   |
| High                |              | 3.949 (2.882-5.413)   | <b>&lt;2e-16</b>  |              | 3.184 ( 2.578-3.932) | <b>&lt;2e-16</b>  |
| TCGA subtypes       | 301          |                       |                   | /            |                      |                   |
| MES                 |              | Reference             |                   | /            |                      |                   |
| CL                  |              | 0.891 (0.523-1.519)   | 0.6720            | /            |                      | /                 |
| NL                  |              | 0.309 (0.206-0.463)   | <b>1.25e-08</b>   | /            |                      | /                 |
| PL                  |              | 0.386 (0.269-0.552)   | <b>1.99e-07</b>   | /            |                      | /                 |
| PRS                 | 298          |                       |                   | 693          |                      |                   |
| Primary             |              | Reference             |                   |              | Reference            |                   |
| Recurrent/secondary |              | 2.369 (1.546-3.631)   | <b>7.43e-05</b>   |              | 2.182 (1.785-2.667)  | <b>2.57e-14</b>   |
| Grade               | 298          |                       |                   | 692          |                      |                   |
| II                  |              | Reference             |                   |              | Reference            |                   |
| III                 |              | 2.990 (1.892-4.725)   | <b>2.74e-06</b>   |              | 2.545 (1.846-3.509)  | <b>1.17e-08</b>   |
| IV                  |              | 6.938 ( 4.725-10.187) | <b>&lt; 2e-16</b> |              | 6.972 (5.085-9.561)  | <b>&lt; 2e-16</b> |
| Gender              | 301          |                       |                   | 693          |                      |                   |
| Female              |              | Reference             |                   |              | Reference            |                   |
| Male                |              | 1.280 ( 0.950-1.723)  | 0.104             |              | 1.061 (0.868-1.297)  | 0.563             |
| Age                 | 299          |                       |                   | 692          |                      |                   |
| ≤60                 |              | Reference             |                   |              | Reference            |                   |
| >60                 |              | 2.236 (1.403-3.565)   | <b>0.000716</b>   |              | 2.225 (1.681-2.944)  | <b>2.24e-08</b>   |
| Radio status        | 283          |                       |                   | 646          |                      |                   |
| Untreated           |              | Reference             |                   |              | Reference            |                   |
| Treated             |              | 0.569 (0.384-0.844)   | <b>0.00501</b>    |              | 1.241 (0.953-1.615)  | 0.1090            |
| TMZ status          | 277          |                       |                   | 647          |                      |                   |
| Untreated           |              | Reference             |                   |              | Reference            |                   |
| Treated             |              | 1.126 (0.839-1.513)   | 0.429             |              | 1.243 (0.974-1.586)  | 0.0809            |

| Characteristics   | Total<br>(N) | CGGA_mRNA-array_301  |                 | Total<br>(N) | CGGA_mRNAseq_693     |                  |
|-------------------|--------------|----------------------|-----------------|--------------|----------------------|------------------|
|                   |              | Hazard ratio (95%CI) | p value         |              | Hazard ratio (95%CI) | p value          |
| IDH status        | 301          |                      |                 | 642          |                      |                  |
| Wildtype          |              | Reference            |                 |              | Reference            |                  |
| Mutant            |              | 0.391 (0.287-0.533)  | <b>2.46e-09</b> |              | 0.323 (0.262-0.398)  | <b>&lt;2e-16</b> |
| 1p19q codeletion  | 92           |                      |                 | 623          |                      |                  |
| Non-codel         |              | Reference            |                 |              | Reference            |                  |
| Codel             |              | 0.149 (0.053-0.416)  | <b>0.000274</b> |              | 0.268 (0.193-0.372)  | <b>2.98e-15</b>  |
| MGMTp methylation | 286          |                      |                 | 542          |                      |                  |
| Unmethylated      |              | Reference            |                 |              | Reference            |                  |
| Methylated        |              | 1.234 ( 0.912-1.670) | 0.173           |              | 0.795 (0.639-0.990)  | <b>0.0407</b>    |
